# Supplementary material for: Pyrolyzed and unpyrolyzed residues enhance maize yield under varying rates of application and fertilization regimes
Source: PeerJ. 2024 Jun 14;12:e17513. doi: 10.7717/peerj.17513 (PMC11182025; doi:10.7717/peerj.17513)
Supplement: Supplemental Information 2 [file peerj-12-17513-s002.xlsx]

## Sheet: Sheet1
Year	A	R	I	PH	DW	NCP	NK	SP	CL	CG	GCY	GY	TW	SY
IST	A1	L	N	147.22	55.56	0.33	346.23	29.1175	15.146	12.16	3.24	20.53	97.03	5.31
IST	A1	L	F	164.71	60.68	0.37	371.62	34.6567	17.4805	13.31	4.61	23.76	120.11	7.22
IST	A1	M	N	157.81	62.21	0.35	341.62	28.8767	15.0445	12.11	4.09	25.56	81.04	6.528
IST	A1	M	F	172.18	65.64	0.39	404.12	35.1383	17.6835	13.41	5.78	32.78	127.008	8.62
IST	A1	H	N	162.31	63.64	0.43	362.61	28.1542	14.74	11.96	4.36	28.12	120.2	7.12
IST	A1	H	F	179.64	68.65	0.4	431.12	34.175	17.2775	13.21	6.21	34.76	128.67	9.96
IST	A2	L	N	217.13	69.32	0.4	402.13	53.2008	25.296	17.16	8.04	22.45	267.408	12.07
IST	A2	L	F	229.14	72.64	0.52	456.21	62.3525	29.153	19.06	9.63	24.51	338.544	15.03
IST	A2	M	N	244.71	73.41	0.61	423.12	55.3683	26.2095	17.61	8.89	27.69	284.256	14.21
IST	A2	M	F	259.31	82.34	0.86	496.12	63.075	29.4575	19.21	10.24	34.84	344.16	20.21
IST	A2	H	N	269.12	86.21	0.67	450.12	41.4	20.3225	14.71	9.68	30.56	175.68	17.03
IST	A2	H	F	286.11	91.31	0.92	510.14	51.0333	24.3825	16.71	12.68	36.65	250.56	23.24
IST	A3	L	N	253.12	94.34	1.32	450.31	50.7925	24.281	16.66	9.61	31.62	248.688	16.23
IST	A3	L	F	282.11	105.43	1.37	496.75	64.52	30.0665	19.51	13.46	35.68	355.392	18.92
IST	A3	M	N	296.14	110.21	1.42	530.31	58.74	27.6305	18.31	10.21	38.12	310.464	19.21
IST	A3	M	F	301.11	130.64	1.89	592.34	67.6508	31.386	20.16	15.48	51.47	379.728	27.22
IST	A3	H	N	303.16	134.43	1.53	541.12	46.2167	22.3525	15.71	12.21	40.26	213.12	23.22
IST	A3	H	F	309.14	160.23	2.01	523.46	54.8867	26.0065	17.51	16.43	56.38	280.512	29.35
IST	A4	L	N	141.61	121.12	1.0446	369.21	28.8767	15.0445	12.11	6.86	24.83	98.336	6.528
IST	A4	L	F	152.31	128.91	1.2791	435.64	37.3058	18.597	13.86	8.09	27.43	143.856	11.988
IST	A4	M	N	168.11	131.12	0.9843	421.34	26.7092	14.131	11.66	7.64	29.43	61.488	5.124
IST	A4	M	F	177.12	140.26	1.1853	461.67	33.9342	17.176	13.16	9.78	38.64	117.648	9.804
IST	A4	H	N	171.21	134.21	0.8235	439.22	20.9292	11.695	10.46	8.63	33.48	86.56	1.38
IST	A4	H	F	184.21	143.21	1.0178	472.67	27.9133	14.6385	11.91	10.12	41.64	90.848	5.904
IST	A5	L	N	222	116.23	1.5739	386.41	47.9025	23.063	16.06	7.97	26.67	226.224	18.852
IST	A5	L	F	181.12	120.64	1.7012	443.12	52.4783	24.9915	17.01	9.41	28.12	261.792	21.816
IST	A5	M	N	193.41	126.21	1.5136	402.61	45.735	22.1495	15.61	8.01	30.14	209.376	17.448
IST	A5	M	F	209.31	138.12	1.7481	471.17	54.1642	25.702	17.36	10.56	42.68	274.896	22.908
IST	A5	H	N	217.14	131.06	1.2255	450.18	35.3792	17.785	13.46	8.62	35.68	128.88	10.74
IST	A5	H	F	219.14	142.61	1.46	496.24	43.8083	21.3375	15.21	11.21	44.32	194.4	16.2
IST	A6	L	N	235.41	86.43	1.6677	436.12	51.2742	24.484	16.76	8.64	29.4	252.432	21.036
IST	A6	L	F	249.12	93.21	1.795	484.31	55.85	26.4125	17.71	9.89	31.48	288	24
IST	A6	M	N	252.14	107.11	1.6744	451.21	51.515	24.5855	16.81	9.43	33.12	254.304	21.192
IST	A6	M	F	268.12	121.41	1.8419	521.16	57.5358	27.123	18.06	12.68	45.62	301.104	25.092
IST	A6	H	N	261.31	126.31	1.3193	472.34	38.7508	19.206	14.16	10.25	37.72	155.088	12.924
IST	A6	H	F	271.18	153.41	1.5538	547.24	47.18	22.7585	15.91	13.62	48.23	220.608	18.384
IST	A7	L	N	146.12	109.64	1.1451	372.34	32.4892	16.567	12.86	5.32	23.43	106.416	8.868
IST	A7	L	F	151.18	117.41	1.3796	431.45	40.9183	20.1195	14.61	7.43	26.23	171.936	14.328
IST	A7	M	N	169.12	125.43	1.0848	423.11	30.3217	15.6535	12.41	6.12	28.12	99.568	7.464
IST	A7	M	F	175.11	135.64	1.2858	446.15	37.5467	18.6985	13.91	8.45	36.82	145.728	12.144
IST	A7	H	N	173.12	129.43	0.9642	450.14	25.9867	13.8265	11.51	7.26	31.56	95.872	4.656
IST	A7	H	F	181.41	138.61	1.1451	460.43	32.4892	16.567	12.86	9.78	38.91	106.416	8.868
IST	A1	L	N	139.41	67.21	0.38	339.54	27.9133	14.6385	11.91	4.32	25.62	130.848	5.904
IST	A1	L	F	157.22	69.23	0.48	367.56	33.4525	16.973	13.06	5.32	27.42	113.904	9.492
IST	A1	M	N	167.21	69.21	0.44	349.67	29.84	15.4505	12.31	5.68	29.43	110.824	7.152
IST	A1	M	F	180.12	70.12	0.48	421.11	35.62	17.8865	13.51	6.23	37.65	130.752	10.896
IST	A1	H	N	168.32	73.33	0.49	375.25	29.1175	15.146	12.16	5.22	32.25	100.208	6.684
IST	A1	H	F	185.44	76.12	0.47	443.36	33.6933	17.0745	13.11	7.12	39.11	115.776	9.648
IST	A2	L	N	222.34	77.81	0.46	406.72	51.0333	24.3825	16.71	9.54	26.35	250.56	20.88
IST	A2	L	F	236.11	79.23	0.59	463.22	63.075	29.4575	19.21	10.05	29.19	344.16	28.68
IST	A2	M	N	256.13	89.21	0.68	432.45	54.405	25.8035	17.41	9.17	31.82	276.768	23.064
IST	A2	M	F	267.1	89.34	0.92	504.27	62.1117	29.0515	19.01	11.16	38.45	336.672	28.056
IST	A2	H	N	278.67	97.34	0.76	458.32	43.0858	21.033	15.06	10.17	39.44	188.784	15.732
IST	A2	H	F	279.27	98.56	0.99	521.17	51.7558	24.687	16.86	13.56	42.67	256.176	16.73
IST	A3	L	N	247.17	109.34	1.42	458.33	51.2742	24.484	16.76	10.58	35.62	252.432	21.036
IST	A3	L	F	289.45	115.67	1.43	505.26	63.075	29.4575	19.21	13.89	38.38	344.16	18.27
IST	A3	M	N	299.11	137.45	1.48	541.37	58.2583	27.4275	18.21	11.67	43.45	306.72	19.22
IST	A3	M	F	298.17	139.56	2.01	586.47	68.1325	31.589	20.26	16.67	55.12	383.472	28.17
IST	A3	H	N	310.11	169.71	1.66	535.28	45.0125	21.845	15.46	13.54	46.73	203.76	22.65
IST	A3	H	F	301.17	129.28	2.17	536.76	53.4417	25.3975	17.21	17.75	62.39	269.28	29.67
IST	A4	L	N	132.33	135.56	1.12	375.65	30.0808	15.552	12.36	7.48	29.17	113.696	7.308
IST	A4	L	F	158.26	138.45	1.32	442.18	38.2692	19.003	14.06	8.87	33.56	151.344	12.612
IST	A4	M	N	177.25	147.34	1.05	432.19	27.9133	14.6385	11.91	8.19	34.76	127.848	5.904
IST	A4	M	F	184.12	139.56	1.25	470.14	34.8975	17.582	13.36	10.08	44.18	125.136	10.428
IST	A4	H	N	170.44	149.45	0.94	447.34	22.615	12.4055	10.81	9.08	38.19	117.664	2.472
IST	A4	H	F	191.76	123.45	0.98	481.17	27.4317	14.4355	11.81	10.87	47.21	167.104	5.592
IST	A5	L	N	232.16	126.46	1.64	394.55	48.8658	23.469	16.26	8.49	32.37	233.712	19.476
IST	A5	L	F	192.31	120.43	1.75	454.74	53.6825	25.499	17.26	9.87	32.36	271.152	22.596
IST	A5	M	N	199.23	144.55	1.63	417.37	46.9392	22.657	15.86	8.89	35.47	218.736	18.228
IST	A5	M	F	219.67	138.34	1.83	482.56	53.2008	25.296	17.16	11.67	47.57	267.408	22.284
IST	A5	H	N	228.76	148.67	1.31	455.27	37.5467	18.6985	13.91	9.38	39.58	145.728	12.144
IST	A5	H	F	226.33	94.12	1.54	506.71	44.0492	21.439	15.26	12.78	49.57	196.272	16.356
IST	A6	L	N	246.54	99.67	1.75	428.45	52.2375	24.89	16.96	9.08	34.47	259.92	21.66
IST	A6	L	F	254.35	112.24	1.87	496.18	57.0542	26.92	17.96	10.48	36.33	297.36	24.78
IST	A6	M	N	261.12	129.68	1.74	462.29	52.7192	25.093	17.06	10.89	38.47	263.664	21.972
IST	A6	M	F	261.16	140.11	1.92	530.14	56.5725	26.717	17.86	13.58	49.48	293.616	24.468
IST	A6	H	N	273.65	159.55	1.4	479.15	40.9183	20.1195	14.61	11.68	41.39	171.936	14.328
IST	A6	H	F	264.16	115.49	1.62	554.45	47.4208	22.86	15.96	14.86	51.12	222.48	18.54
IST	A7	L	N	153.87	123.46	1.21	383.37	33.6933	17.0745	13.11	7.75	28.43	115.776	9.648
IST	A7	L	F	159.55	132.26	1.43	439.61	41.8817	20.5255	14.81	8.47	30.12	179.424	14.952
IST	A7	M	N	174.43	139.11	1.15	416.17	32.2483	16.4655	12.81	7.78	33.23	104.544	8.712
IST	A7	M	F	184.21	136.76	1.36	453.34	38.51	19.1045	14.11	9.18	40.17	153.216	12.768
IST	A7	H	N	180.11	144.24	1.06	461.56	26.2275	13.928	11.56	8.26	36.72	97.744	4.812
IST	A7	H	F	186.21	101.2	1.21	474.27	31.0442	15.958	12.56	10.45	42.39	145.184	7.932
IST	A1	L	N	136.12	64.45	0.42	346.72	27.6725	14.537	11.86	6.66	28.62	138.976	5.748
IST	A1	L	F	151.21	72.12	0.54	374.12	32.9708	16.77	12.96	7.26	31.26	110.16	9.18
IST	A1	M	N	152.12	77.46	0.48	338.76	32.4892	16.567	12.86	6.48	32.18	106.416	8.868
IST	A1	M	F	172.24	75.34	0.55	435.27	34.8975	17.582	13.36	8.37	39.12	125.136	10.428
IST	A1	H	N	175.54	80.38	0.51	383.42	27.4317	14.4355	11.81	10.28	35.47	119.104	5.592
IST	A1	H	F	172.88	81.23	0.49	450.18	33.2117	16.8715	13.01	11.28	42.67	112.032	9.336
IST	A2	L	N	231.16	83.24	0.52	415.37	51.515	24.5855	16.81	10.37	30.28	254.304	21.192
IST	A2	L	F	246.71	83.43	0.54	471.17	64.0383	29.8635	19.41	12.58	34.28	351.648	29.304
IST	A2	M	N	262.31	95.16	0.73	440.15	53.9233	25.6005	17.31	11.27	36.17	273.024	22.752
IST	A2	M	F	270.11	96.45	1.03	515.16	62.5933	29.2545	19.11	14.44	42.38	340.416	28.368
IST	A2	H	N	283.56	105.34	0.79	466.16	43.8083	21.3375	15.21	11.32	44.67	194.4	16.2
IST	A2	H	F	271.11	106.77	1.04	528.22	51.2742	24.484	16.76	14.68	47.74	252.432	21.036
IST	A3	L	N	240.11	114.42	1.54	467.56	51.9967	24.7885	16.91	12.69	40.28	258.048	19.22
IST	A3	L	F	295.41	120.67	1.5	515.15	64.0383	29.8635	19.41	17.78	42.37	351.648	25.14
IST	A3	M	N	302.14	145.43	1.53	549.34	58.0175	27.326	18.16	14.49	46.76	304.848	25.404
IST	A3	M	F	290.61	144.67	1.97	593.26	68.6142	31.792	20.36	18.44	59.62	387.216	30.12
IST	A3	H	N	297.56	172.34	1.7	543.22	47.18	22.7585	15.91	8.69	50.17	220.608	26.52
IST	A3	H	F	296.17	134.32	2.11	545.27	52.7192	25.093	17.06	9.64	60.78	263.664	32.62
IST	A4	L	N	140.67	139.65	1.16	383.47	28.6358	14.943	12.06	9.19	35.38	133.464	6.372
IST	A4	L	F	146.44	146.78	1.37	449.51	36.5833	18.2925	13.71	11.17	38.47	138.24	11.52
IST	A4	M	N	168.56	152.34	1.09	447.12	27.1908	14.334	11.76	10.22	38.19	132.232	5.436
IST	A4	M	F	172.17	143.56	1.29	483.22	33.6933	17.0745	13.11	11.09	47.54	115.776	9.648
IST	A4	H	N	164.76	153.56	0.98	456.71	23.0967	12.6085	10.91	9.47	41.18	73.408	2.784
IST	A4	H	F	198.21	131.22	1.17	495.34	27.6725	14.537	11.86	10.08	50.17	98.976	5.748
IST	A5	L	N	226.12	130.18	1.69	404.22	45.4942	22.048	15.56	9.58	36.39	207.504	17.292
IST	A5	L	F	197.71	128.66	1.81	463.27	51.2742	24.484	16.76	12.63	36.28	252.432	21.036
IST	A5	M	N	205.41	151.18	1.69	423.54	47.4208	22.86	15.96	10.11	38.24	222.48	18.54
IST	A5	M	F	231.56	144.65	1.87	493.17	54.6458	25.905	17.46	13.64	50.12	278.64	23.22
IST	A5	H	N	236.71	153.58	1.38	464.37	36.3425	18.191	13.66	10.17	42.38	136.368	11.364
IST	A5	H	F	232.12	102.31	1.62	517.28	44.5308	21.642	15.36	11.18	51.27	200.016	16.668
IST	A6	L	N	238.78	105.37	1.75	436.72	48.8658	23.469	16.26	11.75	38.27	233.712	19.476
IST	A6	L	F	267.45	106.65	1.91	504.38	54.6458	25.905	17.46	14.51	38.11	278.64	23.22
IST	A6	M	N	254.56	127.87	1.79	474.38	53.2008	25.296	17.16	12.58	40.17	267.408	22.284
IST	A6	M	F	270.34	144.65	1.98	539.28	58.0175	27.326	18.16	15.64	51.27	304.848	25.404
IST	A6	H	N	266.62	161.23	1.47	486.41	39.7142	19.612	14.36	8.69	44.21	162.576	13.548
IST	A6	H	F	256.45	120.17	1.69	563.22	47.9025	23.063	16.06	9.6	53.65	226.224	18.852
IST	A7	L	N	165.34	130.27	1.29	393.45	32.73	16.6685	12.91	8.86	31.18	108.288	9.024
IST	A7	L	F	163.23	138.56	1.29	445.22	40.1958	19.815	14.46	10.27	33.71	166.32	13.86
IST	A7	M	N	178.67	145.68	1.29	426.35	30.8033	15.8565	12.51	9.16	36.28	132.312	7.776
IST	A7	M	F	193.34	141.75	1.43	463.35	37.3058	18.597	13.86	11.61	43.26	143.856	11.988
IST	A7	H	N	172.12	151.43	1.06	473.27	26.7092	14.131	11.66	3.89	38.15	126.488	5.124
IST	A7	H	F	192.78	107.44	1.28	484.38	31.285	16.0595	12.61	4.19	44.25	125.056	8.088
2nd	A1	L	N	151.12	68.34	0.46	351.24	30.3217	15.6535	12.41	4.89	23.46	114.568	7.464
2nd	A1	L	F	172.33	70.12	0.49	378.26	35.8608	17.988	13.56	5.76	25.65	132.624	11.052
2nd	A1	M	N	164.23	67.12	0.43	350.17	30.0808	15.552	12.36	5.66	28.16	105.696	7.308
2nd	A1	M	F	179.64	71.23	0.49	414.17	36.3425	18.191	13.66	6.28	35.28	136.368	11.364
2nd	A1	H	N	177.12	74.34	0.44	375.27	29.3583	15.2475	12.21	5.76	30.18	124.08	6.84
2nd	A1	H	F	186.56	73.11	0.51	443.27	35.3792	17.785	13.46	7.18	36.17	128.88	10.74
2nd	A2	L	N	226.67	76.23	0.55	417.17	55.3683	26.2095	17.61	9.22	25.27	284.256	23.688
2nd	A2	L	F	237.15	77.28	0.59	463.16	64.52	30.0665	19.51	10.72	26.17	355.392	29.616
2nd	A2	M	N	253.56	88.28	0.68	433.16	57.5358	27.123	18.06	9.57	29.48	301.104	25.092
2nd	A2	M	F	265.12	91.28	0.91	504.27	65.2425	30.371	19.66	11.41	36.76	361.008	30.084
2nd	A2	H	N	275.76	97.12	0.72	462.17	43.5675	21.236	15.16	10.27	33.18	192.528	16.044
2nd	A2	H	F	293.54	102.21	0.98	496.11	53.2008	25.296	17.16	13.49	38.27	267.408	22.284
2nd	A3	L	N	266.34	112.56	1.38	464.27	52.96	25.1945	17.11	10.49	33.28	265.536	19.61
2nd	A3	L	F	295.16	116.47	1.43	504.17	66.6875	30.98	19.96	14.17	37.18	372.24	24.13
2nd	A3	M	N	305.11	137.58	1.48	544.56	60.9075	28.544	18.76	11.47	41.17	327.312	23.41
2nd	A3	M	F	309.18	139.74	1.95	603.56	69.8183	32.2995	20.61	16.76	54.18	396.576	31.84
2nd	A3	H	N	311.34	166.49	1.59	554.12	48.3842	23.266	16.16	13.48	44.16	229.968	25.72
2nd	A3	H	F	315.22	127.39	2.15	625.26	57.0542	26.92	17.96	17.54	68.16	297.36	33.12
2nd	A4	L	N	156.44	134.58	1.15	375.25	33.2117	16.8715	13.01	7.48	26.71	112.032	9.336
2nd	A4	L	F	167.14	138.49	1.38	445.36	41.6408	20.424	14.76	9.17	29.17	177.552	14.796
2nd	A4	M	N	176.76	145.67	1.06	432.16	31.0442	15.958	12.56	8.57	33.12	95.184	7.932
2nd	A4	M	F	185.45	139.56	1.3	473.16	38.2692	19.003	14.06	10.44	41.18	151.344	12.612
2nd	A4	H	N	184.23	148.56	0.92	446.27	25.2642	13.522	11.36	9.17	35.71	90.256	4.188
2nd	A4	H	F	194.22	124.39	1.1	484.16	32.2483	16.4655	12.81	11.48	43.67	104.544	8.712
2nd	A5	L	N	233.16	127.44	1.68	394.45	50.5517	24.1795	16.61	8.58	29.18	246.816	20.568
2nd	A5	L	F	195.67	131.39	1.77	450.15	55.1275	26.108	17.56	10.27	31.27	282.384	23.532
2nd	A5	M	N	206.11	142.67	1.58	414.55	48.3842	23.266	16.16	9.16	33.16	229.968	19.164
2nd	A5	M	F	223.16	141.12	1.82	480.24	56.8133	26.8185	17.91	11.47	45.76	295.488	24.624
2nd	A5	H	N	231.16	147.84	1.29	460.25	38.0283	18.9015	14.01	9.49	38.38	149.472	12.456
2nd	A5	H	F	230.11	92.56	1.53	504.24	46.4575	22.454	15.76	12.36	47.28	214.992	17.916
2nd	A6	L	N	247.28	98.59	1.73	443.26	53.9233	25.6005	17.31	9.54	32.18	273.024	22.752
2nd	A6	L	F	253.18	114.69	1.87	493.15	58.4992	27.529	18.26	10.58	34.56	308.592	25.716
2nd	A6	M	N	264.45	128.84	1.75	464.37	54.1642	25.702	17.36	10.15	37.18	274.896	22.908
2nd	A6	M	F	276.16	131.22	1.93	532.22	60.185	28.2395	18.61	13.11	47.17	321.696	26.808
2nd	A6	H	N	275.34	159.49	1.43	483.16	41.4	20.3225	14.71	11.19	40.13	175.68	14.64
2nd	A6	H	F	285.54	116.37	1.64	554.36	49.8292	23.875	16.46	14.68	50.19	241.2	20.1
2nd	A7	L	N	154.23	124.46	1.28	383.24	36.5833	18.2925	13.71	6.38	25.67	138.24	11.52
2nd	A7	L	F	163.23	131.56	1.45	441.15	45.0125	21.845	15.46	8.59	28.76	203.76	16.98
2nd	A7	M	N	178.12	139.48	1.18	430.12	34.4158	17.379	13.26	7.48	31.16	121.392	10.116
2nd	A7	M	F	183.56	134.55	1.38	452.33	41.6408	20.424	14.76	9.38	38.17	177.552	14.796
2nd	A7	H	N	186.34	142.32	1.07	458.28	30.0808	15.552	12.36	8.48	34.26	87.696	7.308
2nd	A7	H	F	193.27	74.34	1.21	474.66	36.5833	18.2925	13.71	10.66	41.28	138.24	11.52
2nd	A1	L	N	144.56	75.76	0.43	344.33	29.1175	15.146	12.16	5.63	27.57	80.208	6.684
2nd	A1	L	F	166.26	75.28	0.56	375.35	34.6567	17.4805	13.31	6.58	29.59	123.264	10.272
2nd	A1	M	N	174.67	70.12	0.53	364.25	31.0442	15.958	12.56	6.48	31.28	110.184	7.932
2nd	A1	M	F	193.56	78.17	0.59	436.25	36.8242	18.394	13.76	7.38	39.17	140.112	11.676
2nd	A1	H	N	177.45	81.49	0.56	384.36	30.3217	15.6535	12.41	6.38	35.19	121.568	7.464
2nd	A1	H	F	191.23	82.37	0.63	453.47	34.8975	17.582	13.36	8.67	42.57	125.136	10.428
2nd	A2	L	N	235.67	83.34	0.51	417.44	53.2008	25.296	17.16	10.47	28.67	267.408	22.284
2nd	A2	L	F	244.45	92.37	0.62	474.27	65.2425	30.371	19.66	11.27	32.18	361.008	30.084
2nd	A2	M	N	267.18	94.67	0.63	440.15	56.5725	26.717	17.86	10.48	34.27	293.616	24.468
2nd	A2	M	F	278.47	102.34	0.99	515.26	64.2792	29.965	19.46	12.37	40.18	353.52	29.46
2nd	A2	H	N	286.46	103.66	0.82	465.44	45.2533	21.9465	15.51	11.42	42.29	205.632	17.136
2nd	A2	H	F	288.65	114.13	1.06	539.36	53.9233	25.6005	17.31	14.57	44.53	273.024	22.752
2nd	A3	L	N	256.66	118.68	1.5	465.37	53.4417	25.3975	17.21	11.69	37.48	269.28	18.46
2nd	A3	L	F	297.34	142.76	1.56	514.39	65.2425	30.371	19.66	14.69	40.43	361.008	21.28
2nd	A3	M	N	304.35	143.38	1.52	548.25	60.4258	28.341	18.66	12.08	46.17	323.568	22.12
2nd	A3	M	F	305.11	174.53	2.07	594.26	70.3	32.5025	20.71	17.28	58.57	400.32	32.78
2nd	A3	H	N	310.11	134.59	1.72	546.74	47.18	22.7585	15.91	14.68	50.15	220.608	24.15
2nd	A3	H	F	310.17	139.55	2.26	543.32	55.6092	26.311	17.66	18.48	60.17	286.128	30.12
2nd	A4	L	N	146.34	142.37	1.27	384.15	34.4158	17.379	13.26	8.63	31.22	121.392	10.116
2nd	A4	L	F	166.87	152.39	1.45	449.25	42.6042	20.83	14.96	9.38	36.17	185.04	15.42
2nd	A4	M	N	186.45	144.43	1.16	440.15	32.2483	16.4655	12.81	9.44	37.47	104.544	8.712
2nd	A4	M	F	195.67	153.85	1.3	482.26	39.2325	19.409	14.26	11.26	47.19	158.832	13.236
2nd	A4	H	N	184.23	129.29	0.99	456.54	26.95	14.2325	11.71	10.07	40.11	63.36	5.28
2nd	A4	H	F	199.45	131.38	1.06	490.32	31.7667	16.2625	12.71	11.37	49.18	100.8	8.4
2nd	A5	L	N	243.22	127.49	1.72	404.23	51.515	24.5855	16.81	9.64	35.17	254.304	21.192
2nd	A5	L	F	203.12	149.43	1.82	459.24	56.3317	26.6155	17.81	10.78	35.75	291.744	24.312
2nd	A5	M	N	205.56	143.25	1.69	425.37	49.5883	23.7735	16.41	9.63	37.28	239.328	19.944
2nd	A5	M	F	233.45	152.23	1.95	492.45	55.85	26.4125	17.71	12.48	49.17	288	24
2nd	A5	H	N	237.45	102.22	1.4	463.47	40.1958	19.815	14.46	10.48	41.28	166.32	13.86
2nd	A5	H	F	233.56	103.45	1.59	515.45	46.6983	22.5555	15.81	13.69	51.29	216.864	18.072
2nd	A6	L	N	256.34	117.81	1.82	436.28	54.8867	26.0065	17.51	10.28	37.27	280.512	23.376
2nd	A6	L	F	267.18	134.56	1.92	503.21	59.7033	28.0365	18.51	11.75	38.11	317.952	26.496
2nd	A6	M	N	274.45	147.67	1.8	471.25	55.3683	26.2095	17.61	11.78	41.57	284.256	23.688
2nd	A6	M	F	276.54	164.39	1.97	543.26	59.2217	27.8335	18.41	14.11	51.49	314.208	26.184
2nd	A6	H	N	283.87	119.47	1.47	486.43	43.5675	21.236	15.16	12.86	44.39	192.528	16.044
2nd	A6	H	F	275.34	127.56	1.68	562.21	50.07	23.9765	16.51	15.75	54.38	243.072	20.256
2nd	A7	L	N	167.56	138.39	1.27	393.46	37.7875	18.8	13.96	8.53	30.18	147.6	12.3
2nd	A7	L	F	163.21	144.23	1.49	446.26	45.9758	22.251	15.66	9.75	33.17	211.248	17.604
2nd	A7	M	N	183.12	139.48	1.25	425.23	36.3425	18.191	13.66	8.38	35.18	136.368	11.364
2nd	A7	M	F	192.17	151.28	1.39	465.46	42.6042	20.83	14.96	10.31	42.14	185.04	15.42
2nd	A7	H	N	189.65	109.49	1.14	474.38	30.3217	15.6535	12.41	9.28	39.16	99.568	7.464
2nd	A7	H	F	192.56	74.51	1.25	485.24	35.1383	17.6835	13.41	11.28	44.37	127.008	10.584
2nd	A1	L	N	145.56	79.67	0.48	354.87	29.1175	15.146	12.16	7.45	31.29	110.208	6.684
2nd	A1	L	F	163.87	82.49	0.59	387.58	34.8975	17.582	13.36	8.48	33.75	125.136	10.428
2nd	A1	M	N	167.45	84.67	0.54	345.6	34.4158	17.379	13.26	7.74	35.85	121.392	10.116
2nd	A1	M	F	187.67	88.39	0.58	443.32	36.3425	18.191	13.66	9.85	41.49	136.368	11.364
2nd	A1	H	N	188.57	88.28	0.61	395.37	28.8767	15.0445	12.11	11.47	38.84	78.336	6.528
2nd	A1	H	F	182.31	89.37	0.66	465.37	35.3792	17.785	13.46	12.11	45.39	128.88	10.74
2nd	A2	L	N	245.78	90.18	0.47	424.56	54.1642	25.702	17.36	11.08	33.29	274.896	22.908
2nd	A2	L	F	256.28	101.29	0.54	485.47	66.9283	31.0815	20.01	13.57	37.29	374.112	31.176
2nd	A2	M	N	274.66	104.38	0.78	451.26	56.3317	26.6155	17.81	12.48	38.19	291.744	24.312
2nd	A2	M	F	284.55	112.49	1.12	524.36	65.0017	30.2695	19.61	15.59	45.58	359.136	29.928
2nd	A2	H	N	295.87	110.48	0.84	476.33	46.2167	22.3525	15.71	12.46	46.84	213.12	17.76
2nd	A2	H	F	284.45	119.39	1.11	537.54	53.9233	25.6005	17.31	15.84	49.58	273.024	22.752
2nd	A3	L	N	254.45	127.38	1.67	475.46	54.6458	25.905	17.46	13.68	43.19	278.64	20.21
2nd	A3	L	F	304.61	149.49	1.74	527.47	66.9283	31.0815	20.01	18.69	45.39	374.112	23.87
2nd	A3	M	N	309.1	150.28	1.58	554.38	60.6667	28.4425	18.71	15.56	48.94	325.44	23.87
2nd	A3	M	F	302.11	178.38	2.04	606.37	71.0225	32.807	20.86	19.35	62.37	405.936	26.67
2nd	A3	H	N	306.44	138.32	1.78	551.25	49.5883	23.7735	16.41	9.78	52.38	239.328	31.12
2nd	A3	H	F	304.34	143.23	1.99	552.15	55.85	26.4125	17.71	10.54	62.18	288	34.12
2nd	A4	L	N	153.25	152.33	1.23	394.54	33.4525	16.973	13.06	10.48	37.18	113.904	9.492
2nd	A4	L	F	156.67	157.37	1.39	456.56	41.8817	20.5255	14.81	12.48	40.17	179.424	14.952
2nd	A4	M	N	176.75	149.47	1.25	453.27	32.2483	16.4655	12.81	11.29	40.15	104.544	8.712
2nd	A4	M	F	186.39	158.39	1.36	496.71	38.7508	19.206	14.16	12.63	50.11	155.088	12.924
2nd	A4	H	N	176.59	138.38	1.05	466.65	27.9133	14.6385	11.91	10.59	44.27	98.848	5.904
2nd	A4	H	F	207.44	137.65	1.27	503.21	32.73	16.6685	12.91	11.72	53.29	108.288	9.024
2nd	A5	L	N	237.76	134.28	1.75	415.67	48.8658	23.469	16.26	10.88	39.37	233.712	19.476
2nd	A5	L	F	206.29	155.36	1.9	475.26	54.405	25.8035	17.41	13.84	39.74	276.768	23.064
2nd	A5	M	N	217.37	149.48	1.75	439.64	51.0333	24.3825	16.71	11.41	41.82	250.56	20.88
2nd	A5	M	F	244.56	158.48	1.97	501.11	58.0175	27.326	18.16	14.57	53.22	304.848	25.404
2nd	A5	H	N	248.48	110.47	1.43	476.26	39.2325	19.409	14.26	11.57	45.29	158.832	13.236
2nd	A5	H	F	246.75	109.47	1.69	524.52	48.1433	23.1645	16.11	12.78	54.37	228.096	19.008
2nd	A6	L	N	249.56	110.27	1.79	445.37	51.7558	24.687	16.86	12.67	41.38	256.176	21.348
2nd	A6	L	F	276.49	134.32	1.98	517.17	58.2583	27.4275	18.21	15.87	41.47	306.72	25.56
2nd	A6	M	N	268.46	149.37	1.85	485.27	56.5725	26.717	17.86	13.74	43.28	293.616	24.468
2nd	A6	M	F	284.31	170.11	2.04	545.36	61.3892	28.747	18.86	16.5	53.22	331.056	27.588
2nd	A6	H	N	276.58	127.37	1.54	493.37	43.3267	21.1345	15.11	9.48	47.47	190.656	15.888
2nd	A6	H	F	268.59	138.38	1.74	576.48	51.0333	24.3825	16.71	10.3	55.39	250.56	20.88
2nd	A7	L	N	174.28	144.47	1.34	404.36	37.3058	18.597	13.86	9.39	33.27	143.856	11.988
2nd	A7	L	F	169.44	149.43	1.36	453.24	44.7717	21.7435	15.41	11.49	35.38	201.888	16.824
2nd	A7	M	N	184.48	144.74	1.32	432.45	35.62	17.8865	13.51	10.63	39.77	130.752	10.896
2nd	A7	M	F	205.44	157.37	1.49	476.38	41.6408	20.424	14.76	12.48	46.84	177.552	14.796
2nd	A7	H	N	185.62	115.68	1.18	485.37	31.5258	16.161	12.66	4.56	41.17	134.928	8.244
2nd	A7	H	F	204.57	110.47	1.37	495.75	36.1017	18.0895	13.61	5.38	47.38	134.496	11.208

## Sheet: Sheet2
Year	A	R	I	PH	2nd yr	averge	DW	2nd	average	GY	2nd year	Average	SY	2nd year	avg	DW	GY	SY
IST	A1	L	N	110.2	130.2	120.2	55.56	45.4	50.48	3.24	4.89	4.065	5.31	7.464	6.387	5.048	0.324	0.6387
IST	A1	L	F	164.71	172.33	168.52	70.3	70.12	70.21	4.61	5.76	5.185	7.22	11.052	9.136	7.021	0.461	0.9136
IST	A1	M	N	137.4	127.6	132.5	57.8	48.5	53.15	4.09	5.66	4.875	6.528	7.308	6.918	5.315	0.409	0.6918
IST	A1	M	F	172.18	179.64	175.91	65.64	71.23	68.435	5.78	6.28	6.03	8.62	11.364	9.992	6.8435	0.578	0.9992
IST	A1	H	N	142.1	131.2	136.65	60.4	52.3	56.35	4.36	5.76	5.06	7.12	6.84	6.98	5.635	0.436	0.698
IST	A1	H	F	220.6	186.56	203.58	68.65	73.11	70.88	6.21	7.18	6.695	9.96	10.74	10.35	7.088	0.621	1.035
IST	A2	L	N	217.13	207.3	212.215	63.5	76.23	69.865	8.04	9.22	8.63	12.07	23.688	17.879	6.9865	0.804	1.7879
IST	A2	L	F	229.14	237.15	233.145	84.5	83.2	83.85	9.63	10.72	10.175	15.03	29.616	22.323	8.385	0.963	2.2323
IST	A2	M	N	191.2	210.2	200.7	75.4	76.3	75.85	8.89	9.57	9.23	14.21	25.092	19.651	7.585	0.889	1.9651
IST	A2	M	F	259.31	265.12	262.215	90.5	91.28	90.89	10.24	11.41	10.825	20.21	30.084	25.147	9.089	1.024	2.5147
IST	A2	H	N	208.2	220.1	214.15	78.4	82	80.2	9.68	10.27	9.975	17.03	16.044	16.537	8.02	0.968	1.6537
IST	A2	H	F	286.11	293.54	289.825	115.9	110.3	113.1	12.68	13.49	13.085	23.24	22.284	22.762	11.31	1.268	2.2762
IST	A3	L	N	253.12	222.3	237.71	80.2	102.3	91.25	9.61	10.49	10.05	16.23	19.61	17.92	9.125	0.961	1.792
IST	A3	L	F	282.11	295.16	288.635	105.43	116.47	110.95	13.46	14.17	13.815	18.92	24.13	21.525	11.095	1.346	2.1525
IST	A3	M	N	210.2	235.4	222.8	85.3	107.5	96.4	10.21	11.47	10.84	19.21	23.41	21.31	9.64	1.021	2.131
IST	A3	M	F	301.11	309.18	305.145	122.5	129.6	126.05	15.48	16.76	16.12	27.22	31.84	29.53	12.605	1.548	2.953
IST	A3	H	N	218.8	239.4	229.1	91.6	117.4	104.5	12.21	13.48	12.845	23.22	25.72	24.47	10.45	1.221	2.447
IST	A3	H	F	309.14	315.22	312.18	140.4	140.6	140.5	16.43	17.54	16.985	29.35	33.12	31.235	14.05	1.643	3.1235
IST	A4	L	N	115.2	139.2	127.2	90.5	65.4	77.95	6.86	7.48	7.17	6.528	9.336	7.932	7.795	0.686	0.7932
IST	A4	L	F	152.31	167.14	159.725	109.6	87.6	98.6	8.09	9.17	8.63	11.988	14.796	13.392	9.86	0.809	1.3392
IST	A4	M	N	158.2	161.2	159.7	105.4	72.3	88.85	7.64	8.57	8.105	5.124	7.932	6.528	8.885	0.764	0.6528
IST	A4	M	F	177.12	185.45	181.285	117.7	92.4	105.05	9.78	10.44	10.11	9.804	12.612	11.208	10.505	0.978	1.1208
IST	A4	H	N	140.1	170.2	155.15	109.5	76.3	92.9	8.63	9.17	8.9	1.38	4.188	2.784	9.29	0.863	0.2784
IST	A4	H	F	184.21	194.22	189.215	126.7	95.6	111.15	10.12	11.48	10.8	5.904	8.712	7.308	11.115	1.012	0.7308
IST	A5	L	N	140.1	180.2	160.15	90.3	79.6	84.95	7.97	8.58	8.275	18.852	20.568	19.71	8.495	0.797	1.971
IST	A5	L	F	181.12	195.67	188.395	105.8	90.5	98.15	9.41	10.27	9.84	21.816	23.532	22.674	9.815	0.941	2.2674
IST	A5	M	N	193.41	181.2	187.305	97.6	89.7	93.65	8.01	9.16	8.585	17.448	19.164	18.306	9.365	0.801	1.8306
IST	A5	M	F	209.31	223.16	216.235	110.6	97.6	104.1	10.56	11.47	11.015	22.908	24.624	23.766	10.41	1.056	2.3766
IST	A5	H	N	188.3	191.2	189.75	105.4	93.3	99.35	8.62	9.49	9.055	10.74	12.456	11.598	9.935	0.862	1.1598
IST	A5	H	F	219.14	230.11	224.625	115.6	105.6	110.6	11.21	12.36	11.785	16.2	17.916	17.058	11.06	1.121	1.7058
IST	A6	L	N	186.4	200.2	193.3	86.43	98.59	92.51	8.64	9.54	9.09	21.036	22.752	21.894	9.251	0.864	2.1894
IST	A6	L	F	249.12	253.18	251.15	93.21	114.69	103.95	9.89	10.58	10.235	24	25.716	24.858	10.395	0.989	2.4858
IST	A6	M	N	201.1	205.6	203.35	82.5	90.5	86.5	9.43	10.15	9.79	21.192	22.908	22.05	8.65	0.943	2.205
IST	A6	M	F	268.12	268.7	268.41	121.41	110.7	116.055	12.68	13.11	12.895	25.092	26.808	25.95	11.6055	1.268	2.595
IST	A6	H	N	222.1	212.2	217.15	86.5	98.7	92.6	10.25	11.19	10.72	12.924	14.64	13.782	9.26	1.025	1.3782
IST	A6	H	F	271.18	271.2	271.19	134.6	116.37	125.485	13.62	14.68	14.15	18.384	20.1	19.242	12.5485	1.362	1.9242
IST	A7	L	N	133.8	137.6	135.7	94.5	55.3	74.9	5.32	6.38	5.85	8.868	11.52	10.194	7.49	0.532	1.0194
IST	A7	L	F	151.18	163.23	157.205	93.3	68.7	81	7.43	8.59	8.01	14.328	16.98	15.654	8.1	0.743	1.5654
IST	A7	M	N	144.6	161.3	152.95	86.5	58.6	72.55	6.12	7.48	6.8	7.464	10.116	8.79	7.255	0.612	0.879
IST	A7	M	F	175.11	183.56	179.335	100.6	71.2	85.9	8.45	9.38	8.915	12.144	14.796	13.47	8.59	0.845	1.347
IST	A7	H	N	150.3	167.2	158.75	90.5	62.3	76.4	7.26	8.48	7.87	4.656	7.308	5.982	7.64	0.726	0.5982
IST	A7	H	F	181.41	193.27	187.34	105.6	74.34	89.97	9.78	10.66	10.22	8.868	11.52	10.194	8.997	0.978	1.0194
IST	A1	L	N	114.6	127.7	121.15	67.21	44.2	55.705	4.32	5.63	4.975	5.904	6.684	6.294	5.5705	0.432	0.6294
IST	A1	L	F	157.22	166.26	161.74	69.23	71.3	70.265	5.32	6.58	5.95	9.492	10.272	9.882	7.0265	0.532	0.9882
IST	A1	M	N	145.6	140.8	143.2	60.3	47.6	53.95	5.68	6.48	6.08	7.152	7.932	7.542	5.395	0.568	0.7542
IST	A1	M	F	180.12	193.56	186.84	70.12	78.17	74.145	6.23	7.38	6.805	10.896	11.676	11.286	7.4145	0.623	1.1286
IST	A1	H	N	151.3	135.6	143.45	65.6	55.7	60.65	5.22	6.38	5.8	6.684	7.464	7.074	6.065	0.522	0.7074
IST	A1	H	F	216.7	191.23	203.965	76.12	82.37	79.245	7.12	8.67	7.895	9.648	10.428	10.038	7.9245	0.712	1.0038
IST	A2	L	N	222.34	202.4	212.37	61.8	80.4	71.1	9.54	10.47	10.005	20.88	22.284	21.582	7.11	0.954	2.1582
IST	A2	L	F	236.11	244.45	240.28	79.23	86.3	82.765	10.05	11.27	10.66	28.68	30.084	29.382	8.2765	1.005	2.9382
IST	A2	M	N	195.2	215.3	205.25	74.5	80.3	77.4	9.17	10.48	9.825	23.064	24.468	23.766	7.74	0.917	2.3766
IST	A2	M	F	267.1	278.47	272.785	92.4	102.34	97.37	11.16	12.37	11.765	28.056	29.46	28.758	9.737	1.116	2.8758
IST	A2	H	N	211.2	225.3	218.25	76.5	81.8	79.15	10.17	11.42	10.795	15.732	17.136	16.434	7.915	1.017	1.6434
IST	A2	H	F	279.27	288.65	283.96	109.5	112.7	111.1	13.56	14.57	14.065	16.73	22.752	19.741	11.11	1.356	1.9741
IST	A3	L	N	247.17	235.4	241.285	82.6	107.6	95.1	10.58	11.69	11.135	21.036	18.46	19.748	9.51	1.058	1.9748
IST	A3	L	F	289.45	297.34	293.395	115.67	114.6	115.135	13.89	14.69	14.29	18.27	21.28	19.775	11.5135	1.389	1.9775
IST	A3	M	N	215.4	243.1	229.25	81.7	104.3	93	11.67	12.08	11.875	19.22	22.12	20.67	9.3	1.167	2.067
IST	A3	M	F	298.17	305.11	301.64	120.8	130.5	125.65	16.67	17.28	16.975	28.17	32.78	30.475	12.565	1.667	3.0475
IST	A3	H	N	227.8	250.4	239.1	86.5	115.4	100.95	13.54	14.68	14.11	22.65	24.15	23.4	10.095	1.354	2.34
IST	A3	H	F	301.17	310.17	305.67	129.28	139.55	134.415	17.75	18.48	18.115	29.67	30.12	29.895	13.4415	1.775	2.9895
IST	A4	L	N	107.3	141.2	124.25	87.5	68.3	77.9	7.48	8.63	8.055	7.308	10.116	8.712	7.79	0.748	0.8712
IST	A4	L	F	158.26	166.87	162.565	104.5	84.2	94.35	8.87	9.38	9.125	12.612	15.42	14.016	9.435	0.887	1.4016
IST	A4	M	N	155.8	155.6	155.7	114.6	75.6	95.1	8.19	9.44	8.815	5.904	8.712	7.308	9.51	0.819	0.7308
IST	A4	M	F	184.12	195.67	189.895	115.5	88.5	102	10.08	11.26	10.67	10.428	13.236	11.832	10.2	1.008	1.1832
IST	A4	H	N	147.2	166.6	156.9	111.5	79.4	95.45	9.08	10.07	9.575	2.472	5.28	3.876	9.545	0.908	0.3876
IST	A4	H	F	191.76	199.45	195.605	123.45	90.3	106.875	10.87	11.37	11.12	5.592	8.4	6.996	10.6875	1.087	0.6996
IST	A5	L	N	158.6	175.5	167.05	87.7	83.6	85.65	8.49	9.64	9.065	19.476	21.192	20.334	8.565	0.849	2.0334
IST	A5	L	F	192.31	203.12	197.715	101.6	88.6	95.1	9.87	10.78	10.325	22.596	24.312	23.454	9.51	0.987	2.3454
IST	A5	M	N	199.23	184.4	191.815	92.4	92.3	92.35	8.89	9.63	9.26	18.228	19.944	19.086	9.235	0.889	1.9086
IST	A5	M	F	219.67	233.45	226.56	108.6	102.4	105.5	11.67	12.48	12.075	22.284	24	23.142	10.55	1.167	2.3142
IST	A5	H	N	173.6	185.2	179.4	108.6	88.6	98.6	9.38	10.48	9.93	12.144	13.86	13.002	9.86	0.938	1.3002
IST	A5	H	F	226.33	233.56	229.945	94.12	103.45	98.785	12.78	13.69	13.235	16.356	18.072	17.214	9.8785	1.278	1.7214
IST	A6	L	N	193.3	192.3	192.8	99.67	117.81	108.74	9.08	10.28	9.68	21.66	23.376	22.518	10.874	0.908	2.2518
IST	A6	L	F	254.35	267.18	260.765	112.24	134.56	123.4	10.48	11.75	11.115	24.78	26.496	25.638	12.34	1.048	2.5638
IST	A6	M	N	190.2	197.5	193.85	80.6	87.5	84.05	10.89	11.78	11.335	21.972	23.688	22.83	8.405	1.089	2.283
IST	A6	M	F	261.16	271.7	266.43	118.5	107.5	113	13.58	14.11	13.845	24.468	26.184	25.326	11.3	1.358	2.5326
IST	A6	H	N	212.7	223.1	217.9	87.7	100.2	93.95	11.68	12.86	12.27	14.328	16.044	15.186	9.395	1.168	1.5186
IST	A6	H	F	264.16	275.34	269.75	130.5	119.5	125	14.86	15.75	15.305	18.54	20.256	19.398	12.5	1.486	1.9398
IST	A7	L	N	138.2	142.5	140.35	90.6	53.2	71.9	7.75	8.53	8.14	9.648	12.3	10.974	7.19	0.775	1.0974
IST	A7	L	F	159.55	163.21	161.38	90.6	65.4	78	8.47	9.75	9.11	14.952	17.604	16.278	7.8	0.847	1.6278
IST	A7	M	N	141.6	149.2	145.4	82.4	57.6	70	7.78	8.38	8.08	8.712	11.364	10.038	7	0.778	1.0038
IST	A7	M	F	184.21	192.17	188.19	104.3	68.9	86.6	9.18	10.31	9.745	12.768	15.42	14.094	8.66	0.918	1.4094
IST	A7	H	N	145.7	158.9	152.3	84.6	65.7	75.15	8.26	9.28	8.77	4.812	7.464	6.138	7.515	0.826	0.6138
IST	A7	H	F	186.21	192.56	189.385	102.4	74.51	88.455	10.45	11.28	10.865	7.932	10.584	9.258	8.8455	1.045	0.9258
IST	A1	L	N	118.9	139.7	129.3	64.45	47.5	55.975	6.66	7.45	7.055	5.748	6.684	6.216	5.5975	0.666	0.6216
IST	A1	L	F	151.21	163.87	157.54	72.12	72.4	72.26	7.26	8.48	7.87	9.18	10.428	9.804	7.226	0.726	0.9804
IST	A1	M	N	148.7	143.5	146.1	62.5	50.3	56.4	6.48	7.74	7.11	8.868	10.116	9.492	5.64	0.648	0.9492
IST	A1	M	F	172.24	187.67	179.955	75.34	88.39	81.865	8.37	9.85	9.11	10.428	11.364	10.896	8.1865	0.837	1.0896
IST	A1	H	N	159.8	188.57	174.185	63.5	57.6	60.55	10.28	11.47	10.875	5.592	6.528	6.06	6.055	1.028	0.606
IST	A1	H	F	228.8	182.31	205.555	81.23	89.37	85.3	11.28	12.11	11.695	9.336	10.74	10.038	8.53	1.128	1.0038
IST	A2	L	N	231.16	201.6	216.38	60.5	78.3	69.4	10.37	11.08	10.725	21.192	22.908	22.05	6.94	1.037	2.205
IST	A2	L	F	246.71	256.28	251.495	83.43	89.5	86.465	12.58	13.57	13.075	29.304	31.176	30.24	8.6465	1.258	3.024
IST	A2	M	N	201.2	217.3	209.25	78.5	79.6	79.05	11.27	12.48	11.875	22.752	24.312	23.532	7.905	1.127	2.3532
IST	A2	M	F	270.11	284.55	277.33	96.45	102.6	99.525	14.44	15.59	15.015	28.368	29.928	29.148	9.9525	1.444	2.9148
IST	A2	H	N	202.6	230.1	216.35	79.3	83.1	81.2	11.32	12.46	11.89	16.2	17.76	16.98	8.12	1.132	1.698
IST	A2	H	F	271.11	284.45	277.78	110.5	115.5	113	14.68	15.84	15.26	21.036	22.752	21.894	11.3	1.468	2.1894
IST	A3	L	N	240.11	230.6	235.355	69.9	104.6	87.25	12.69	13.68	13.185	19.22	20.21	19.715	8.725	1.269	1.9715
IST	A3	L	F	295.41	304.61	300.01	120.67	120.7	120.685	17.78	18.69	18.235	25.14	23.87	24.505	12.0685	1.778	2.4505
IST	A3	M	N	217.5	240.4	228.95	86.8	103.7	95.25	14.49	15.56	15.025	25.404	23.87	24.637	9.525	1.449	2.4637
IST	A3	M	F	290.61	302.11	296.36	126.6	134.6	130.6	18.44	19.35	18.895	30.12	26.67	28.395	13.06	1.844	2.8395
IST	A3	H	N	223.6	260.1	241.85	90.7	110.8	100.75	8.69	9.78	9.235	26.52	31.12	28.82	10.075	0.869	2.882
IST	A3	H	F	296.17	304.34	300.255	134.32	143.23	138.775	9.64	10.54	10.09	32.62	34.12	33.37	13.8775	0.964	3.337
IST	A4	L	N	104.6	140.2	122.4	84.4	69.1	76.75	9.19	10.48	9.835	6.372	9.492	7.932	7.675	0.919	0.7932
IST	A4	L	F	146.44	156.67	151.555	110.4	82.2	96.3	11.17	12.48	11.825	11.52	14.952	13.236	9.63	1.117	1.3236
IST	A4	M	N	159.6	157.5	158.55	103.7	71.3	87.5	10.22	11.29	10.755	5.436	8.712	7.074	8.75	1.022	0.7074
IST	A4	M	F	172.17	186.39	179.28	120.6	89.4	105	11.09	12.63	11.86	9.648	12.924	11.286	10.5	1.109	1.1286
IST	A4	H	N	139.7	157.5	148.6	114.6	80.3	97.45	9.47	10.59	10.03	2.784	5.904	4.344	9.745	0.947	0.4344
IST	A4	H	F	198.21	207.44	202.825	120.6	98.6	109.6	10.08	11.72	10.9	5.748	9.024	7.386	10.96	1.008	0.7386
IST	A5	L	N	160.7	168.8	164.75	85.5	87.6	86.55	9.58	10.88	10.23	17.292	19.476	18.384	8.655	0.958	1.8384
IST	A5	L	F	197.71	206.29	202	102.5	93.5	98	12.63	13.84	13.235	21.036	23.064	22.05	9.8	1.263	2.205
IST	A5	M	N	205.41	189.4	197.405	95.4	90.3	92.85	10.11	11.41	10.76	18.54	20.88	19.71	9.285	1.011	1.971
IST	A5	M	F	231.56	244.56	238.06	101.5	107.5	104.5	13.64	14.57	14.105	23.22	25.404	24.312	10.45	1.364	2.4312
IST	A5	H	N	168.8	180.8	174.8	110.6	86.4	98.5	10.17	11.57	10.87	11.364	13.236	12.3	9.85	1.017	1.23
IST	A5	H	F	232.12	246.75	239.435	102.31	109.47	105.89	11.18	12.78	11.98	16.668	19.008	17.838	10.589	1.118	1.7838
IST	A6	L	N	197.6	190.6	194.1	105.37	110.27	107.82	11.75	12.67	12.21	19.476	21.348	20.412	10.782	1.175	2.0412
IST	A6	L	F	267.45	276.49	271.97	106.65	134.32	120.485	14.51	15.87	15.19	23.22	25.56	24.39	12.0485	1.451	2.439
IST	A6	M	N	192.6	199.6	196.1	83.2	85.8	84.5	12.58	13.74	13.16	22.284	24.468	23.376	8.45	1.258	2.3376
IST	A6	M	F	270.34	267.6	268.97	121.6	109.6	115.6	15.64	16.5	16.07	25.404	27.588	26.496	11.56	1.564	2.6496
IST	A6	H	N	215.6	215.2	215.4	89.4	98.6	94	8.69	9.48	9.085	13.548	15.888	14.718	9.4	0.869	1.4718
IST	A6	H	F	256.45	268.59	262.52	128.6	112.4	120.5	9.6	10.3	9.95	18.852	20.88	19.866	12.05	0.96	1.9866
IST	A7	L	N	130.7	143.8	137.25	87.3	56.7	72	8.86	9.39	9.125	9.024	11.988	10.506	7.2	0.886	1.0506
IST	A7	L	F	163.23	169.44	166.335	86.4	64.3	75.35	10.27	11.49	10.88	13.86	16.824	15.342	7.535	1.027	1.5342
IST	A7	M	N	138.7	150.4	144.55	81.3	59.2	70.25	9.16	10.63	9.895	7.776	10.896	9.336	7.025	0.916	0.9336
IST	A7	M	F	193.34	205.44	199.39	106.4	70.4	88.4	11.61	12.48	12.045	11.988	14.796	13.392	8.84	1.161	1.3392
IST	A7	H	N	140.1	160.3	150.2	88.6	71.5	80.05	3.89	4.56	4.225	5.124	8.244	6.684	8.005	0.389	0.6684
IST	A7	H	F	192.78	204.57	198.675	107.44	110.47	108.955	4.19	5.38	4.785	8.088	11.208	9.648	10.8955	0.419	0.9648
